1 **Ginsenoside Rg1 defends PC-12 cells against hydrogen peroxide-caused damage**  
2 **via up-regulation of miR-216a-5p**

3

4 **Running title:** Protective mechanism of ginsenoside Rg1

5

6 Guangkun Yi<sup>1</sup>, Li Liu<sup>2</sup>, Chaoliang Lv<sup>1</sup>, Yanchun Wei<sup>1</sup>, Tingzhen Yan<sup>1,\*</sup>

7 <sup>1</sup>Department of Spine Surgery, Jining No.1 People's Hospital, Jining 272011,  
8 Shandong, China

9 <sup>2</sup>Department of Cardiology, Jining No.1 People's Hospital, Jining 272011, Shandong,  
10 China

11 **\*Address Correspondence to:** Tingzhen Yan, Department of Spine Surgery, Jining  
12 No.1 People's Hospital, No.6, Jiankang Road, Jining 272011, Shandong, China

13 E-mail: tingzhen67ya@163.com

14 Guangkun Yi: zejing47481632@126.com

15 Li Liu: zhaoban9037448@126.com

16 Chaoliang Lv: xini028495@126.com

17 Yanchun Wei: aikai50162218@126.com

18

19 **Abstract**

20 **Background:** Spinal cord injury (SCI) is a destructive trauma accompanying with  
21 local injury, half of which cause chronic paralysis. Ginsenoside Rg1 exerts  
22 anti-apoptosis and anti-autophagy properties. Therefore, our goal was to study the  
23 protective mechanism of Rg1 in attenuating cell injury.

24 **Methods:** MiR-216a-5p inhibitor was transfected into PC-12 cells, then cells were  
25 pre-treated by Rg1 and treated with 300  $\mu$ M hydrogen peroxide ( $H_2O_2$ ) for 24 h.  
26 CCK-8 and apoptosis experiments were done to test cell activity and apoptosis  
27 respectively. Expression of miR-216a-5p and cell damage relative factors was tested  
28 via qRT-PCR and western blot experiments, respectively.

29 **Results:**  $H_2O_2$  induced cell activity suppression, apoptosis and autophagy well at the  
30 concentration of 300  $\mu$ M, leading cell injury. Rg1 could attenuate cell injury induced  
31 by  $H_2O_2$  at the working concentration of 200  $\mu$ M that it elevated cell activity,  
32 attenuated apoptosis and autophagy and activated PI3K/AKT and AMPK signal  
33 pathways. Further, miR-216a-5p was up-regulated by Rg1. Rg1 played its role in  
34 relieving cell injury by positively regulating miR-216a-5p.

35 **Conclusion:** Our study demonstrated that Rg1 attenuated  $H_2O_2$ -caused cell injury  
36 through positively regulated miR-216a-5p.

37 **Key words:** ginsenoside Rg1, miR-216a-5p, cell injury

38

39

## 40 **Introduction**

41 Spinal cord injury (SCI), a common and destructive trauma (Hyun and Kim, 2010), is  
42 mainly caused by external forces such as lateral bending, excessive stretching,  
43 rotation, axial load and excessive bending, resulting in motor dysfunction, paralysis  
44 and other symptoms (van den Berg et al., 2010). Because of the limited therapy  
45 selection, the administration and care of SCI patients places a heavy burden on  
46 patients and caregivers. Of particular note, more than 60% of damages occur at the  
47 cervical level (Cripps et al., 2011), and the lifetime care costs are about at \$1.1-\$4.2  
48 million per patient (Krueger et al., 2013). So, the precaution, curing and recovery of  
49 SCI are a major topic in the medical area. SCI relates two different stages of tissue  
50 injury, called primary and secondary hurt (Badner et al., 2019). Local tissue injury is  
51 caused by SCI and is important in secondary hurt in SCI (Fu et al., 2018), leading to  
52 apoptosis with loss of neurological roles. So, mechanism study of local injury after  
53 SCI is highly significant for curing SCI.

54 Ginsenosides, considering as one of the main pharmacological active ingredients of  
55 ginseng, is a steroid compound (Xiang et al., 2008). Ginsenoside contains the  
56 Panaxatriol (Rg1, Rg2, Re and Rf) and Panaxadiol (Rb1, Rb2, Rc and Rd) classes  
57 (Zhang et al., 2012a). Many beneficial effects of Rg1 have been proved in disorders  
58 such as hypertension (Chen et al., 2012), hypoxia/reoxygenation (Zhang et al., 2012b),  
59 Alzheimer's disease (Huang et al., 2012) etc. Importantly, it has been reported that  
60 Rg1 exerts roles in inhibiting cell apoptosis, thereby exhibiting notable  
61 cardioprotective effects against I/R damage through a variety of mechanisms (Lee and  
62 Kim, 2014). Besides, Rg1 counteracts the aging of endothelial progenitor cells (Shi et  
63 al., 2011) and human fibroblasts (Zhou et al., 2012) and exerts a notable influence in  
64 suppressing cardiomyocytes and renal tubular cells' autophagy (Mao et al., 2016). The  
65 influence of Rg1 in local injury after SCI still has been unknown yet.

66 MicroRNAs (miRNAs), short (22 nucleotides in length) non-coding RNAs, involve  
67 in many biological processes (Jiang and Chen, 2012), such as differentiation of  
68 ordinary tissues and are important in the pathogenesis of lots of human cancers  
69 (Taucher et al., 2016). MiR-216a-5p, known as an oncogene, involved in the  
70 progression of many cancer subtypes (Chen et al., 2018). Chen *et al.* has proved that  
71 miR-216a-5p elevates cell proliferation, activity and motility, and inhibits apoptosis  
72 (Chen et al., 2018). This finding demonstrates that miR-216a-5p has a positive effect  
73 on cell viability and anti-apoptosis. So it could be interesting to investigate if exerts

74 regulation relation of miR-216a-5p and Rg1 in cell injury after SCI. Based on the  
75 above questions and guesses, we probed mechanism of Rg1 against H<sub>2</sub>O<sub>2</sub>-caused cell  
76 damage in PC-12 cells.

## 77 **Materials and Methods**

### 78 ***Cell***

79 PC-12 cells were bought from Kunming Institute of Zoology (Kunming, China) in  
80 this whole study. Seed cells at a denseness of  $1 \times 10^4$  cells/ml in Dulbecco's Modified  
81 Eagle Medium (DMEM)/F-12 medium (Gibco, Carlsbad, CA, USA) adding with 10%  
82 fetal bovine serum (FBS, Gibco), 100 µg/ml streptomycin and 100 U/ml penicillin  
83 (Gibco). Cells were kept in a wet incubator carried 5% CO<sub>2</sub> and 95% air at 37°C.  
84 Change fresh medium every day. Ginsenoside Rg1 (analysis level of 97% pureness)  
85 was bought from Sigma-Aldrich (St. Louis, MO, USA), solubled in ethanol and stored  
86 at -20°C. Pre-treatment of cells with Rg1 for 1 h, and then were treated with a series  
87 of consistences of hydrogen peroxide (H<sub>2</sub>O<sub>2</sub>) for 24 h.

### 88 ***CCK-8 experiment***

89 A Cell Counting Kit-8 (CCK-8, Dojindo Molecular Technologies, Gaithersburg, MD,  
90 USA) was to test cell activity. Seed cells in 96-well plate with 5000 cells/well, and  
91 then add CCK-8 solution, keep cells in a wet environment carried 95% air and 5%  
92 CO<sub>2</sub> for 1 h at 37°C. Absorbance was tested at 450 nm via a Microplate Reader  
93 (Bio-Rad, Hercules, CA, USA).

### 94 ***Apoptosis experiment***

95 Apoptosis analysis was done through propidium iodide (PI) and fluorescein  
96 isothiocyanate (FITC)-conjugated Annexin V staining (BD Pharmingen, San Diego,  
97 CA, USA). Cells were cleaned in phosphatebuffered saline (PBS) for three times and  
98 stained in PI/FITC-Annexin V with 50 µg/ml RNase A (Sigma-Aldrich). Keep cells in  
99 dark processing at the room temperature for 1 h. Flow cytometry analysis was made  
100 through FACS can (Beckman Coulter, Fullerton, CA, USA). Data was analyzed via  
101 FlowJo software (Tree Star Software, San Carlos, California, USA).

### 102 ***Transfection***

103 MiR-216a-5p inhibitor and its relative NC were compounded by Life Technologies  
104 Corporation (Carlsbad, CA, USA) and transferred into cells. Transfection was done  
105 following the Lipofectamine 3000 reagent (Life Technologies Corporation). 48 h  
106 post-transfection was regarded as harvest moment in following assays.

### 107 ***qRT-PCR***

108 Overall RNA was extracted through Trizol reagent (Life Technologies Corporation)  
109 and handled with DNaseI (Promega, Madison, WI, USA). Taqman MicroRNA  
110 Reverse Transcription Kit and Taqman Universal Master Mix II with the TaqMan  
111 MicroRNA Assay (Applied Biosystems, Foster City, CA, USA) were to test  
112 miR-216a-5p expression. U6 was taken as inside comparison.

### 113 **Western Blot**

114 Overall protein was extracted through RIPA lysis buffer (Beyotime Biotechnology,  
115 Shanghai, China) with protease inhibitors (Roche, Basel, Switzerland), and then  
116 quantified through BCA™ Protein Assay Kit (Pierce, Appleton, WI, USA). A Bio-Rad  
117 Bis-Tris Gel system was taken to build up a western blot system. Primary antibodies  
118 specific against Bax (ab32503, Abcam, Cambridge, MA, USA), pro-caspase-3  
119 (ab183179), cleaved-caspase-3 (ab49822), pro-PARP (ab32064), cleaved-PARP  
120 (ab4830),  $\beta$ -actin (ab8226), beclin-1 (ab62557), p62 (ab56416), LC3-I and LC3-II  
121 (ab48394), t-PI3K (ab140307), p-PI3K (ab182651), t-AKT (ab179463), p-AKT  
122 (ab38499), t-AMPK (ab131512) and p-AMPK (ab23875) were readied in 5%  
123 blocking buffer. Primary antibody was cultured with membrane at 4°C all the night,  
124 then washing and incubating with secondary antibody, marking by horseradish  
125 peroxidase for 1 h at room temperature. Then the Polyvinylidene Difluoride (PVDF)  
126 membrane taken along blots and antibodies were transferred into the Bio-Rad  
127 ChemiDoc™ XRS system, adding 200  $\mu$ l Immobilon Western Chemiluminescent  
128 HRP Substrate (Millipore, MA, USA) to shroud film surface. At last, semaphores  
129 were seized and strength of strip was quantified via Image Lab™ Software (Bio-Rad).

### 130 **Statistical analysis**

131 All assays were duplicated for 3 times. Our consequences of multiplex assays are  
132 revealed as mean  $\pm$  SD. Statistical analysis was done via Graphpad Prism 6.0  
133 (GraphPad Software Inc., La Jolla, CA, USA). *P*-values were counted via a one-way  
134 analysis of variance (ANOVA). *P*-value of  $< 0.05$  indicated statistical significant data.

## 135 **Results**

### 136 ***Rgl extenuated H<sub>2</sub>O<sub>2</sub>-induced cell activity suppression and cell apoptosis***

137 PC-12 cells were treated in various H<sub>2</sub>O<sub>2</sub> consistences. From **Figure 1A**, we found  
138 that H<sub>2</sub>O<sub>2</sub> had notably inhibiting effect on cell viability when the concentration was  
139 100 (*P*  $< 0.05$ ), 200 (*P*  $< 0.05$ ), 300 (*P*  $< 0.01$ ), 400 (*P*  $< 0.01$ ) and 500  $\mu$ M (*P*  $<$   
140 0.001). We chose 300  $\mu$ M as the working concentration in the later assays because this  
141 was cell viability semi-lethal concentration. Besides, we tested effect of H<sub>2</sub>O<sub>2</sub> on cell

142 apoptosis. We found that apoptosis was notably increased by H<sub>2</sub>O<sub>2</sub> ( $P < 0.001$ , **Figure**  
143 **1B**). Similarly, apoptosis relative factors (Bax, cleaved-caspase-3 and  
144 cleaved-caspase-PARP) were obviously enhanced through H<sub>2</sub>O<sub>2</sub> (**Figure 1C**), and  
145 standards of these factors were notably raised (all  $P < 0.01$ , **Figure 1D**). We got that  
146 H<sub>2</sub>O<sub>2</sub> caused cell activity suppression and apoptosis.

147 For function of Rg1, following experimental results were clear. As shown in **Figure**  
148 **1E**, there was no effect on cell viability by Rg1. We found that H<sub>2</sub>O<sub>2</sub> could notably  
149 reduce cell viability ( $P < 0.01$ ), whereas Rg1 could notably attenuate this reduction at  
150 200, 300 and 400  $\mu$ M (all  $P < 0.05$ ). We chose 200  $\mu$ M as the working concentration  
151 in the following experiments because this is the concentration when cell viability was  
152 half restored. Besides, for cell apoptosis, we found that Rg1 attenuated apoptosis  
153 induced by H<sub>2</sub>O<sub>2</sub> ( $P < 0.01$ , **Figure 1G**). Similarly, **Figure 1H** revealed that  
154 expression of apoptosis relative factors was weakened by Rg1 compared with H<sub>2</sub>O<sub>2</sub>  
155 group. Levels of these factors were raised through H<sub>2</sub>O<sub>2</sub> ( $P < 0.01$ ,  $P < 0.001$  and  $P <$   
156  $0.01$ ), whereas Rg1 could decrease their levels (all  $P < 0.05$ , **Figure 1I**). So we got  
157 that Rg1 attenuated cell activity suppression and apoptosis induced by H<sub>2</sub>O<sub>2</sub>.

#### 158 ***Rg1 extenuated autophagy induced by H<sub>2</sub>O<sub>2</sub>***

159 For autophagy, we tested three autophagy relative factors. Beclin-1 is autophagy gene  
160 and its overexpression can stimulate autophagy (Yue et al., 2003). Accumulation of  
161 p62 is a notable phenotype of autophagy-deficient tumor cells (Mathew et al., 2009).  
162 LC3-II is a marker for mature autophagosomes. Autophagy could be analyzed by  
163 testing the conversion of the autophagosome marker LC3-I to LC3-II (Wu et al.,  
164 2010). According to our results, **Figure 2A** showed the enhancement of beclin-1 and  
165 LC3-II/LC3-I through H<sub>2</sub>O<sub>2</sub>, while Rg1 could weaken this enhancement. Expression  
166 of p62 was weakened by H<sub>2</sub>O<sub>2</sub>, while Rg1 could eliminate this mitigation (**Figure 2A**).  
167 Besides, **Figure 2B** revealed the notable addition of beclin-1 and  
168 LC3-II/LC3-I through H<sub>2</sub>O<sub>2</sub> ( $P < 0.01$  and  $P < 0.001$ ), whereas were opposite by  
169 adding of Rg1 ( $P < 0.05$  and  $P < 0.01$ ). p62 expression was notably weakened  
170 through H<sub>2</sub>O<sub>2</sub> ( $P < 0.05$ ), whereas was increased by the adding of Rg1 ( $P < 0.05$ ,  
171 **Figure 2B**). So we got that Rg1 could attenuate H<sub>2</sub>O<sub>2</sub>-induced autophagy.

#### 172 ***Rg1 positively regulated miR-216a-5p***

173 From **Figure 3**, qRT-PCR assay indicated that miR-216a-5p was notably  
174 down-regulated after H<sub>2</sub>O<sub>2</sub> treatment ( $P < 0.05$ ). But, it was specifically up-regulated  
175 by adding Rg1 ( $P < 0.01$ ). So we got that Rg1 up-regulated miR-216a-5p.

176 ***Rg1 extenuated cell activity suppression, apoptosis and autophagy induced by H<sub>2</sub>O<sub>2</sub>***  
177 ***through up-regulating miR-216a-5p***

178 qRT-PCR revealed that miR-216a-5p expression was notably suppressed after  
179 miR-216a-5p inhibitor transfection ( $P < 0.01$ , **Figure 4A**). Cell viability was notably  
180 aggravated by Rg1 contrast with H<sub>2</sub>O<sub>2</sub> set ( $P < 0.05$ ), whereas was notably alleviated  
181 when treated with Rg1 plus miR-216a-5p inhibitor ( $P < 0.05$ , **Figure 4B**). This result  
182 indicated that Rg1 attenuated H<sub>2</sub>O<sub>2</sub>-induced cell activity suppression by up-regulating  
183 miR-216a-5p. Besides, cell apoptosis was notably decreased by Rg1 contrast with  
184 H<sub>2</sub>O<sub>2</sub> set ( $P < 0.01$ ), whereas was notably increased when treated with Rg1 plus  
185 miR-216a-5p inhibitor ( $P < 0.01$ , **Figure 4C**). **Figure 4D-E** further indicated that  
186 levels of apoptosis relative factors were notably decreased through Rg1 contrast with  
187 H<sub>2</sub>O<sub>2</sub> set ( $P < 0.05$ ,  $P < 0.01$  and  $P < 0.01$ ), whereas were raised in Rg1-treated cells  
188 with miR-216a-5p inhibitor ( $P < 0.05$ ,  $P < 0.01$  and  $P < 0.05$ ). So we got that Rg1  
189 reduced H<sub>2</sub>O<sub>2</sub>-caused apoptosis by up-regulating miR-216a-5p. Additionally, **Figure**  
190 **4F-G** revealed the notable attenuation of beclin-1 and LC3-II/LC3-I ( $P < 0.01$  and  $P$   
191  $< 0.001$ ) by Rg1 and level of p62 was increased ( $P < 0.05$ ) by Rg1 contrast with  
192 H<sub>2</sub>O<sub>2</sub> set. However, beclin-1 and LC3-II/LC3-I were notably enhanced (both  $P < 0.05$ )  
193 and level of p62 was notably decreased when treated with Rg1 plus miR-216a-5p  
194 inhibitor ( $P < 0.05$ ). So we got that Rg1 attenuated H<sub>2</sub>O<sub>2</sub>-induced autophagy by  
195 up-regulating miR-216a-5p.

196 ***Signal pathway***

197 To further study the mechanism of Rg1, we focused on PI3K/AKT and AMPK signal  
198 pathways. **Figure 5A-B** indicated the notable addition levels of p-PI3K and p-AKT  
199 through Rg1 contrast with H<sub>2</sub>O<sub>2</sub> set ( $P < 0.01$  and  $P < 0.05$ ), whereas were notably  
200 alleviated in Rg1-treated cells with miR-216a-5p inhibitor ( $P < 0.01$  and  $P < 0.05$ ).  
201 Besides, **Figure 5C-D** revealed that level of p-AMPK was notably aggravated by Rg1  
202 compared with H<sub>2</sub>O<sub>2</sub> group ( $P < 0.01$ ), whereas was notably alleviated in Rg1-treated  
203 cells with miR-216a-5p inhibitor ( $P < 0.01$ ). These results indicated that Rg1 elevated  
204 PI3K/AKT and AMPK pathways via positively modulating miR-216a-5p.

205 **Discussion**

206 SCI is a life-changing event. Recently, there is no effective treatment method to  
207 resume the functions of SCI patients. The complexity of SCI pathophysiology poses a  
208 huge challenge for researchers and clinicians seeking to develop therapeutic  
209 interventions (Bareyre, 2019). Local injury is the main event of secondary injury in

210 SCI, eventually leading to apoptosis and ultimately loss of neurological function  
211 (Genovese et al., 2009). Therefore, defending cells against local injury or relieving  
212 this injury can be an effective method to cure SCI. Rg1, an active component of  
213 ginsenosides, has been proved to exert positive effect on anti-apoptosis (Zu et al.,  
214 2016). Cell damage has been reported to be induced by H<sub>2</sub>O<sub>2</sub> in cardiomyocytes  
215 (Zeng et al., 2019) and neural cells (Chen et al., 2016). Therefore, our study also  
216 found that H<sub>2</sub>O<sub>2</sub> was a mediator capable of inducing damage in PC-12 cells, including  
217 activity suppression, promotion of autophagy and apoptosis. Our study firstly  
218 researched the attenuated mechanism of Rg1 in H<sub>2</sub>O<sub>2</sub>-caused damage in PC-12 cells.  
219 Rg1 was effective in defending PC-12 cells against H<sub>2</sub>O<sub>2</sub>-caused damage. Rg1 could  
220 extenuate H<sub>2</sub>O<sub>2</sub>-induced cell activity suppression, apoptosis and autophagy, and active  
221 PI3K/AKT and AMPK pathways via positively regulating miR-216a-5p. Our results  
222 indicated that Rg1 may be an effective treatment of curing SCI.

223 Ginsenoside Rg1, the main bioactive ingredient in ginseng, has been proved to exert  
224 low toxicity that there was no change on cell viability and proliferation (Li et al.,  
225 2017). Much evidence indicates that Rg1 exerts beneficial effects, like anti-aging  
226 properties (Zhu et al., 2014). As we all know, Bax may control mitochondrial  
227 permeability transition and promote releasing cytochrome c, ultimately triggering the  
228 activation of caspases, leading to apoptosis (Li et al., 2017). Consistently, in our study,  
229 treatment of Rg1 reduced the level of Bax, at the same time, cleaved-caspase-3 and  
230 cleaved-caspase-PARP were weakened. These observations verified the anti-apoptosis  
231 function of Rg1. Additionally, autophagy is an important cellular process where  
232 cytoplasmic components are digested by lysosomes to keep cell homeostasis and  
233 energy production (Ravikumar et al., 2010). Rg1 has a notable pharmacological  
234 influence in suppressing autophagy (Mao et al., 2016). Our study were consistent with  
235 the report that Rg1 strongly inhibited autophagic factor (beclin-1 and LC3-II/LC3-I),  
236 and counteracted attenuation of p62 induced by H<sub>2</sub>O<sub>2</sub>, leading to inhibiting  
237 H<sub>2</sub>O<sub>2</sub>-induced autophagy in PC-12 cells. Consistently, our study indicated that Rg1  
238 could counteract inhibition of cell activity induced by H<sub>2</sub>O<sub>2</sub> and attenuate cell  
239 apoptosis and autophagy, suggesting the anti-oxidant and anti-autophagy functions of  
240 Rg1 in SCI.

241 To further study the mechanism of Rg1, we turn our attention to miRNA. MiRNA is  
242 important in cell growth, like proliferation and apoptosis (Ameres and Zamore, 2013).  
243 MiR-216a-5p, acknowledged as an oncogenic gene, is involved in tumorigenesis and



244 development of human cancers (Liu et al., 2018). MiR-216a-5p significantly elevated  
245 cell activity and reduced apoptosis in H<sub>2</sub>O<sub>2</sub>-caused 16 HBE cells of Asthma,  
246 suggesting that miR-216a-5p could regulate H<sub>2</sub>O<sub>2</sub>-caused damage (Chaoyang et al.,  
247 2019). Besides, of interest, beclin-1 was the latent mark of miR-216-5p, which could  
248 inhibit ox-LDL-induced autophagy in human umbilical vein endothelial cells  
249 (HUVECs) through modulating levels of intracellular beclin-1 (Menghini et al., 2014).  
250 These reports indicate that miR-216a-5p not only elevates activity, suppresses  
251 apoptosis, but also inhibits autophagy, suggesting that miR-216a-5p may reduce  
252 H<sub>2</sub>O<sub>2</sub>-caused cell damage. Also, functions of miR-216a-5p are similar to those of Rg1.  
253 So it is worth to investigate if exerts a relation of Rg1 and miR-216a-5p. For the first  
254 time, our study found the regulation relationship between Rg1 and miR-216a-5p. We  
255 got that Rg1 could up-regulate miR-216a-5p to attenuate cell injury induced by H<sub>2</sub>O<sub>2</sub>.  
256 This finding is a major discovery in SCI research.

257 Furthermore, the biological process is inseparable from the regulation of signal  
258 pathways. It has been proved that AMPK/PI3K/AKT pathways are key coordinator  
259 protecting cells from oxidative and inflammatory damage (Lv et al., 2017). PI3K was  
260 reported to be related to many cellular functions, like proliferation and apoptosis  
261 (Rasul et al., 2012). AKT is a key downstream effector of PI3K and exhibits  
262 anti-apoptotic effects (Zheng et al., 2015). AMPK is present in metabolically related  
263 organs. Cellular metabolism stimulation like cell stress can active it (Zheng et al.,  
264 2015). Moreover, Lin *et al.* found that the formation of autophagosomes was  
265 accompanied by inhibition of the PI3K/AKT and AMPK signal pathways. This  
266 finding indicated that there was negative regulation between these two pathways and  
267 autophagy. Therefore, the above findings suggested that there might be positive  
268 effects of these two pathways on H<sub>2</sub>O<sub>2</sub>-caused cell damage. It is worth noting that our  
269 study verified this suppose. We firstly build up the relation among Rg1, miR-216a-5p  
270 and AMPK/PI3K/AKT pathways that Rg1 activated PI3K/AKT and AMPK signal  
271 pathways through positively modulating miR-216a-5p to reduce cell damage. This  
272 regulation mechanism provides a theoretical basis for attenuating cell injury after SCI.

### 273 **Conclusion**

274 Our study firstly reported the underlying effects and mechanism of Rg1 in cell injury  
275 of SCI. We demonstrated that Rg1 could up-regulate miR-216a-5p, attenuate cell  
276 activity suppression, apoptosis and autophagy, and active PI3K/AKT and AMPK  
277 signal pathways to decrease H<sub>2</sub>O<sub>2</sub>-caused damage in PC-12 cells. Because local cell

278 injury significantly aggravates SCI, we propose that Rg1, an effective biological  
279 macromolecular, may supply a novel therapeutic approach for curing SCI.

280 **Conflict of Interest statement**

281 The authors declare that there are no conflicts of interest.

282 **Acknowledgments**

283 None

284 **Fundings**

285 This research did not receive any specific grant from funding agencies in the public,  
286 commercial, or not-for-profit sectors.

287 **Availability of data and materials**

288 The dataset(s) supporting the conclusions of this article is(are) included within the  
289 article.

290

291 **References**

292 **Ameres, S. L. and Zamore, P. D.** (2013). Diversifying microRNA sequence and function. *Nat Rev*  
293 *Mol Cell Biol* **14**, 475-88.

294 **Badner, A., Vidal, P. M., Hong, J., Hacker, J. and Fehlings, M. G.** (2019). Endogenous  
295 Interleukin-10 Deficiency Exacerbates Vascular Pathology in Traumatic Cervical Spinal Cord Injury. *J*  
296 *Neurotrauma*.

297 **Bareyre, M.** (2019). Rehabilitation following spinal cord injury: how animal models can help our  
298 understanding of exercise-induced neuroplasticity. *中国神经再生研究. 英文版*, 405-412.

299 **Chaoyang, Y., Qingfeng, B. and Jinxing, F.** (2019). MiR-216a-5p protects 16HBE cells from  
300 H2O2-induced oxidative stress through targeting HMGB1/NF-kB pathway. *Biochem Biophys Res*  
301 *Commun* **508**, 416-420.

302 **Chen, H., Yin, J., Deng, Y., Yang, M., Xu, L., Teng, F., Li, D., Cheng, Y., Liu, S., Wang, D. et al.**  
303 (2012). The protective effects of ginsenoside Rg1 against hypertension target-organ damage in  
304 spontaneously hypertensive rats. *BMC Complement Altern Med* **12**, 53.

305 **Chen, P., Quan, J., Jin, L., Lin, C., Xu, W., Xu, J., Guan, X., Chen, Z., Ni, L., Yang, S. et al.** (2018).  
306 miR-216a-5p acts as an oncogene in renal cell carcinoma. *Exp Ther Med* **15**, 4039-4046.

307 **Chen, X. H., Zhou, X., Yang, X. Y., Zhou, Z. B., Lu, D. H., Tang, Y., Ling, Z. M., Zhou, L. H. and Feng,**  
308 **X.** (2016). Propofol Protects Against H2O2-Induced Oxidative Injury in Differentiated PC12 Cells via  
309 Inhibition of Ca(2+)-Dependent NADPH Oxidase. *Cell Mol Neurobiol* **36**, 541-51.

310 **Cripps, R. A., Lee, B. B., Wing, P., Weerts, E., Mackay, J. and Brown, D.** (2011). A global map for  
311 traumatic spinal cord injury epidemiology: towards a living data repository for injury prevention.  
312 *Spinal Cord* **49**, 493-501.

313 **Fu, X., Shen, Y., Wang, W. and Li, X.** (2018). MiR-30a-5p ameliorates spinal cord injury-induced  
314 inflammatory responses and oxidative stress by targeting Neurod 1 through MAPK/ERK signalling. **45**,  
315 68-74.

316 **Genovese, T., Esposito, E., Mazzon, E., Di Paola, R., Caminiti, R., Bramanti, P., Cappelani, A. and**  
317 **Cuzzocrea, S.** (2009). Absence of endogenous interleukin-10 enhances secondary inflammatory  
318 process after spinal cord compression injury in mice. *J Neurochem* **108**, 1360-72.

319 **Huang, T., Fang, F., Chen, L., Zhu, Y., Zhang, J., Chen, X. and Yan, S. S.** (2012). Ginsenoside Rg1

320 attenuates oligomeric Abeta(1-42)-induced mitochondrial dysfunction. *Curr Alzheimer Res* **9**, 388-95.

321 **Hyun, J. K. and Kim, H. W.** (2010). Clinical and experimental advances in regeneration of spinal  
322 cord injury. *J Tissue Eng* **2010**, 650857.

323 **Jiang, Y. W. and Chen, L. A.** (2012). microRNAs as tumor inhibitors, oncogenes, biomarkers for  
324 drug efficacy and outcome predictors in lung cancer (review). *Mol Med Rep* **5**, 890-4.

325 **Krueger, H., Noonan, V. K., Trenaman, L. M., Joshi, P. and Rivers, C. S.** (2013). The economic  
326 burden of traumatic spinal cord injury in Canada. *Chronic Dis Inj Can* **33**, 113-22.

327 **Lee, C. H. and Kim, J. H.** (2014). A review on the medicinal potentials of ginseng and ginsenosides  
328 on cardiovascular diseases. *J Ginseng Res* **38**, 161-6.

329 **Li, Q., Xiang, Y., Chen, Y., Tang, Y. and Zhang, Y.** (2017). Ginsenoside Rg1 Protects Cardiomyocytes  
330 Against Hypoxia/Reoxygenation Injury via Activation of Nrf2/HO-1 Signaling and Inhibition of JNK. *Cell*  
331 *Physiol Biochem* **44**, 21-37.

332 **Liu, Y., Huo, Y., Wang, D., Tai, Y., Li, J., Pang, D., Zhang, Y., Zhao, W., Du, N. and Huang, Y.** (2018).  
333 MiR-216a-5p/Hexokinase 2 axis regulates uveal melanoma growth through modulation of Warburg  
334 effect. *Biochem Biophys Res Commun* **501**, 885-892.

335 **Lv, H., Liu, Q., Wen, Z., Feng, H., Deng, X. and Ci, X.** (2017). Xanthohumol ameliorates  
336 lipopolysaccharide (LPS)-induced acute lung injury via induction of AMPK/GSK3beta-Nrf2 signal axis.  
337 *Redox Biol* **12**, 311-324.

338 **Mao, N., Tan, R. Z., Wang, S. Q., Wei, C., Shi, X. L., Fan, J. M. and Wang, L.** (2016). Ginsenoside  
339 Rg1 inhibits angiotensin II-induced podocyte autophagy via AMPK/mTOR/PI3K pathway. *Cell Biol Int* **40**,  
340 917-25.

341 **Mathew, R., Karp, C. M., Beaudoin, B., Vuong, N., Chen, G., Chen, H. Y., Bray, K., Reddy, A.,**  
342 **Bhanot, G., Gelinis, C. et al.** (2009). Autophagy suppresses tumorigenesis through elimination of p62.  
343 *Cell* **137**, 1062-75.

344 **Menghini, R., Casagrande, V., Marino, A., Marchetti, V., Cardellini, M., Stoehr, R., Rizza, S.,**  
345 **Martelli, E., Greco, S., Mauriello, A. et al.** (2014). MiR-216a: a link between endothelial dysfunction  
346 and autophagy. *Cell Death Dis* **5**, e1029.

347 **Rasul, A., Ding, C., Li, X., Khan, M., Yi, F., Ali, M. and Ma, T.** (2012). Dracorhodin perchlorate  
348 inhibits PI3K/Akt and NF-kappaB activation, up-regulates the expression of p53, and enhances  
349 apoptosis. *Apoptosis* **17**, 1104-19.

350           **Ravikumar, B., Sarkar, S., Davies, J. E., Futter, M., Garcia-Arencibia, M., Green-Thompson, Z. W.,**  
351 **Jimenez-Sanchez, M., Korolchuk, V. I., Lichtenberg, M., Luo, S. et al.** (2010). Regulation of mammalian  
352 autophagy in physiology and pathophysiology. *Physiol Rev* **90**, 1383-435.

353           **Shi, A. W., Gu, N., Liu, X. M., Wang, X. and Peng, Y. Z.** (2011). Ginsenoside Rg1 enhances  
354 endothelial progenitor cell angiogenic potency and prevents senescence in vitro. *J Int Med Res* **39**,  
355 1306-18.

356           **Taucher, V., Mangge, H. and Haybaeck, J.** (2016). Non-coding RNAs in pancreatic cancer:  
357 challenges and opportunities for clinical application. *Cell Oncol (Dordr)* **39**, 295-318.

358           **van den Berg, M. E., Castellote, J. M., Mahillo-Fernandez, I. and de Pedro-Cuesta, J.** (2010).  
359 Incidence of spinal cord injury worldwide: a systematic review. *Neuroepidemiology* **34**, 184-92;  
360 discussion 192.

361           **Wu, Y. T., Tan, H. L., Shui, G., Bauvy, C., Huang, Q., Wenk, M. R., Ong, C. N., Codogno, P. and**  
362 **Shen, H. M.** (2010). Dual role of 3-methyladenine in modulation of autophagy via different temporal  
363 patterns of inhibition on class I and III phosphoinositide 3-kinase. *J Biol Chem* **285**, 10850-61.

364           **Xiang, Y. Z., Shang, H. C., Gao, X. M. and Zhang, B. L.** (2008). A comparison of the ancient use of  
365 ginseng in traditional Chinese medicine with modern pharmacological experiments and clinical trials.  
366 *Phytother Res* **22**, 851-8.

367           **Yue, Z., Jin, S., Yang, C., Levine, A. J. and Heintz, N.** (2003). Beclin 1, an autophagy gene essential  
368 for early embryonic development, is a haploinsufficient tumor suppressor. *Proc Natl Acad Sci U S A*  
369 **100**, 15077-82.

370           **Zeng, B., Liu, L., Liao, X., Zhang, C. and Ruan, H.** (2019). Thyroid hormone protects  
371 cardiomyocytes from H<sub>2</sub>O<sub>2</sub>-induced oxidative stress via the PI3K-AKT signaling pathway. *Exp Cell Res.*

372           **Zhang, X., You, L., Anslyn, E. V. and Qian, X.** (2012a). Discrimination and classification of  
373 ginsenosides and ginsengs using bis-boronic acid receptors in dynamic multicomponent indicator  
374 displacement sensor arrays. *Chemistry* **18**, 1102-10.

375           **Zhang, Z. L., Fan, Y. and Liu, M. L.** (2012b). Ginsenoside Rg1 inhibits autophagy in H9c2  
376 cardiomyocytes exposed to hypoxia/reoxygenation. *Mol Cell Biochem* **365**, 243-50.

377           **Zheng, T., Yang, X., Wu, D., Xing, S., Bian, F., Li, W., Chi, J., Bai, X., Wu, G., Chen, X. et al.** (2015).  
378 Salidroside ameliorates insulin resistance through activation of a mitochondria-associated  
379 AMPK/PI3K/Akt/GSK3beta pathway. *Br J Pharmacol* **172**, 3284-301.

380           **Zhou, B. R., Xu, Y., Wu, D., Permatasari, F., Gao, Y. Y. and Luo, D.** (2012). Ginsenoside Rg1  
381 protects human fibroblasts against psoralen- and UVA-induced premature senescence through a  
382 telomeric mechanism. *Arch Dermatol Res* **304**, 223-8.

383           **Zhu, J., Mu, X., Zeng, J., Xu, C., Liu, J., Zhang, M., Li, C., Chen, J., Li, T. and Wang, Y.** (2014).  
384 Ginsenoside Rg1 prevents cognitive impairment and hippocampus senescence in a rat model of  
385 D-galactose-induced aging. *PLoS One* **9**, e101291.

386           **Zu, G., Guo, J., Che, N., Zhou, T., Zhang, X., Wang, G., Ji, A. and Tian, X.** (2016). Protective effects  
387 of ginsenoside Rg1 on intestinal ischemia/reperfusion injury-induced oxidative stress and apoptosis  
388 via activation of the Wnt/beta-catenin pathway. *Sci Rep* **6**, 38480.

389

390

391 **Figure legends**

392 **Figure 1** Influence of Rg1 in cell activity and apoptosis caused by H<sub>2</sub>O<sub>2</sub> in PC-12 cell.

393 (A) Cell viability was tested under diverse consistences of H<sub>2</sub>O<sub>2</sub> (0, 100, 200, 300,  
394 400 and 500 μM). 300 μM was chose in the following experiments. (B) Cell apoptosis  
395 treated by H<sub>2</sub>O<sub>2</sub> was tested via flow cytometry. (C) Apoptosis relative elements  
396 expression was tested via western blot. (D) Level of apoptosis relative factors was  
397 tested via western blot quantitative. (E) Cell viability was tested via CCK-8 by Rg1.  
398 (F) Rg1 attenuated H<sub>2</sub>O<sub>2</sub>-induced suppression of cell viability. (G) Rg1 attenuated  
399 H<sub>2</sub>O<sub>2</sub>-induced cell apoptosis. (H) Expression of apoptosis relative factors was tested  
400 via western blot. (I) Apoptosis relative elements standards were detected via western  
401 blot quantitative. \*  $P < 0.05$ , \*\*  $P < 0.01$  and \*\*\*  $P < 0.001$  contrast with control and  
402 the indicated set.

403 **Figure 2** Influence of Rg1 in autophagy caused by H<sub>2</sub>O<sub>2</sub>. (A) Standards of autophagy  
404 relative factors were tested via western blot. (B) Standards of autophagy relative  
405 factors were tested via western blot quantitative. \*  $P < 0.05$ , \*\*  $P < 0.01$  and \*\*\*  $P <$   
406 0.001 contrast with indicated set.

407 **Figure 3** MiR-216a-5p was up-regulated by Rg1. mRNA standard of miR-216a-5p  
408 was tested via qRT-PCR. \*  $P < 0.05$  and \*\*  $P < 0.01$  contrast with indicated set.

409 **Figure 4** Protective effects of Rg1 via up-regulating miR-216a-5p after transfected  
410 with Rg1 plus miR-216a-5p and relative NC in PC-12 cells. (A) mRNA standard of  
411 miR-216a-5p was tested via qRT-PCR after miR-216a-5p inhibitor transfection. (B)  
412 Cell activity was tested via CCK-8. (C) Apoptosis was tested via flow cytometry. (D)  
413 Expression of apoptosis relative factors was tested via western blot. (E) Level of  
414 apoptosis relative factors was tested via western blot quantitative. (F) Standards of  
415 autophagy relative factors were tested via western blot. (G) Standards of autophagy  
416 relative factors were tested via western blot quantitative. \*  $P < 0.05$ , \*\*  $P < 0.01$  and  
417 \*\*\*  $P < 0.001$  contrast with indicated set.

418 **Figure 5** Rg1 elevated PI3K/AKT and AMPK signal pathways through positively  
419 regulating miR-216a-5p after transfected with Rg1 plus miR-216a-5p and relative NC  
420 in PC-12 cells. (A) Expression of PI3K/AKT pathway relative factors was tested via

421 western blot. (B) Standards of relative proteins were tested via western blot  
422 quantitative. (C) Expression of AMPK pathway relative factors was tested via western  
423 blot. (D) Level of AMPK pathway related proteins were detected via western blot  
424 quantitative. \*  $P < 0.05$  and \*\*  $P < 0.01$  contrast with indicated set.

425



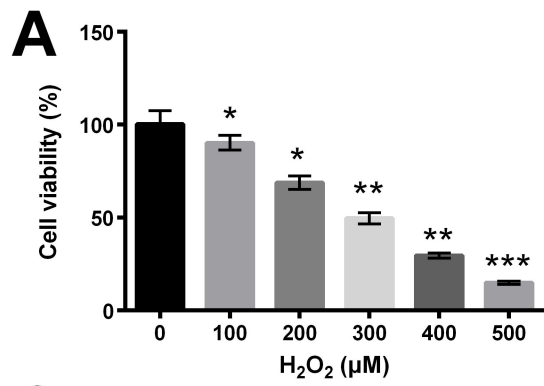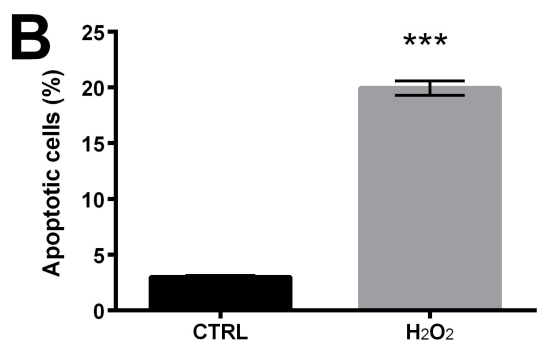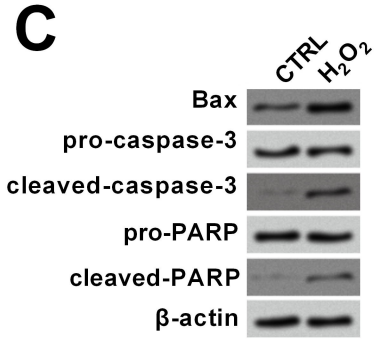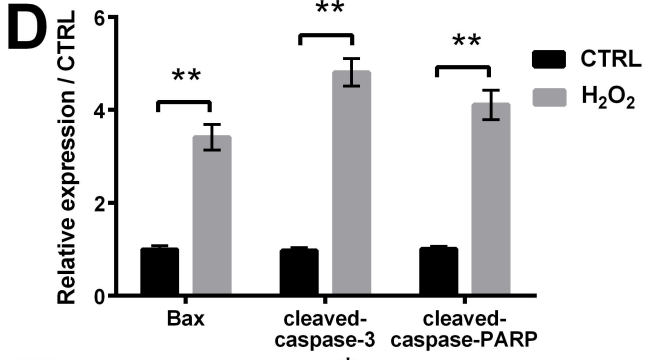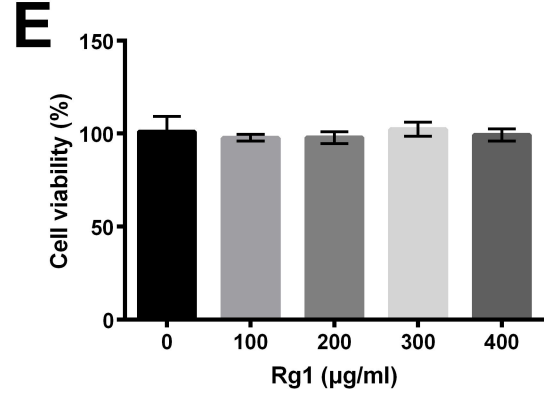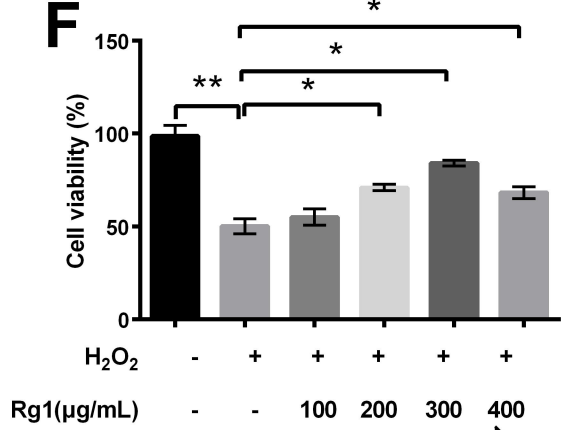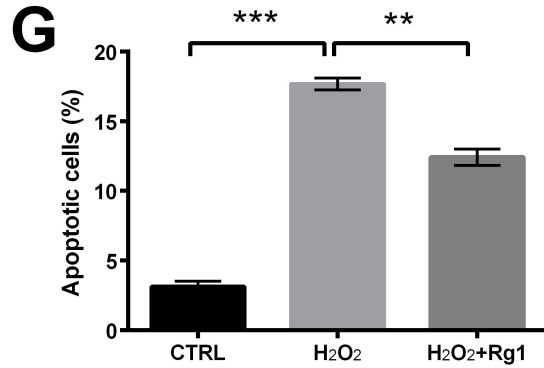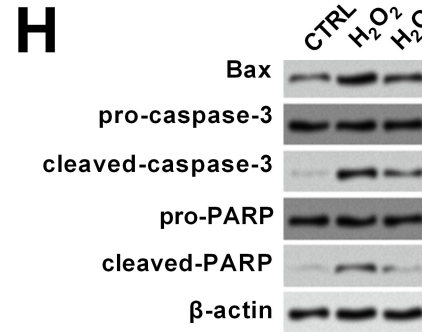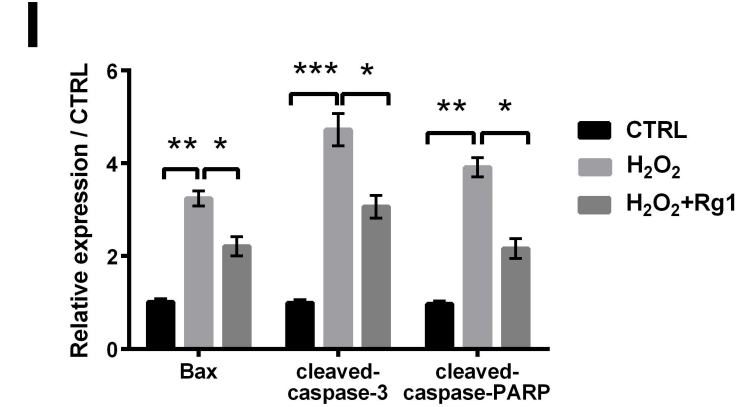

**A**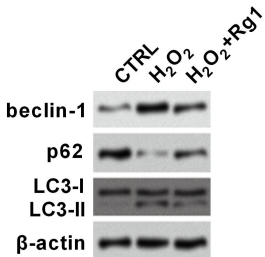**B**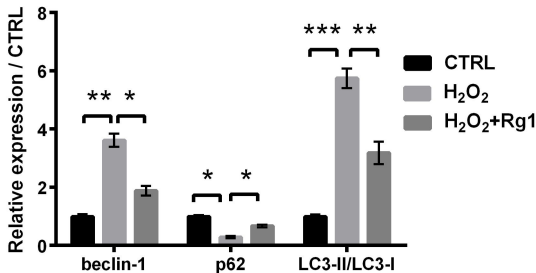

# miR-216a-5p

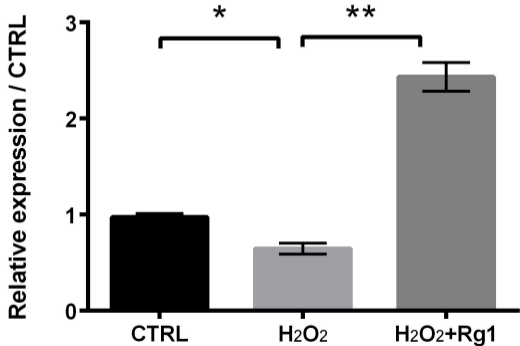

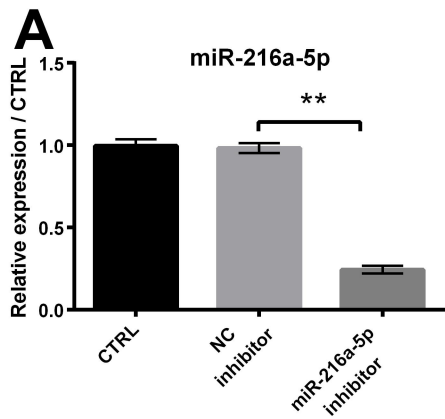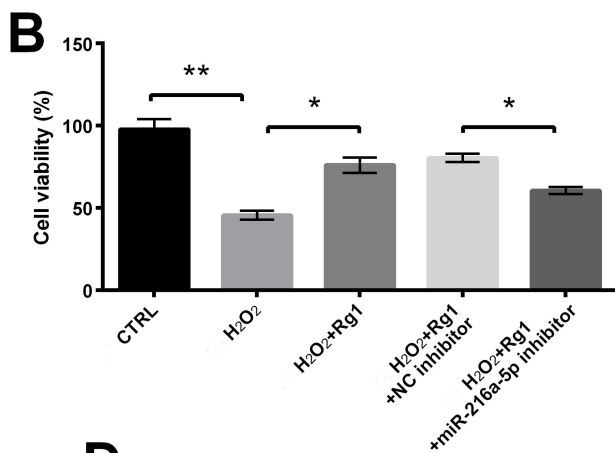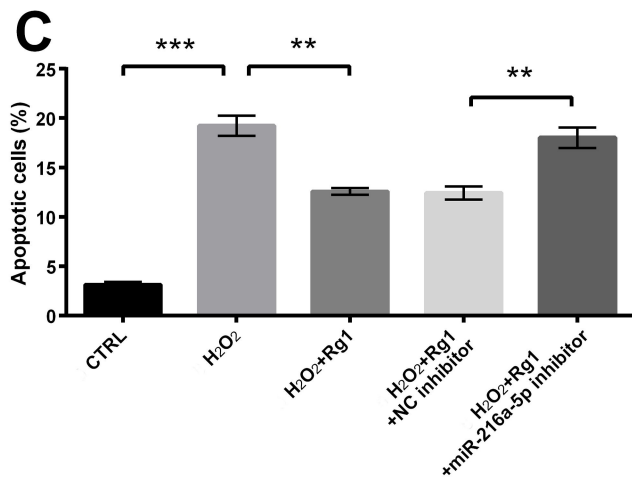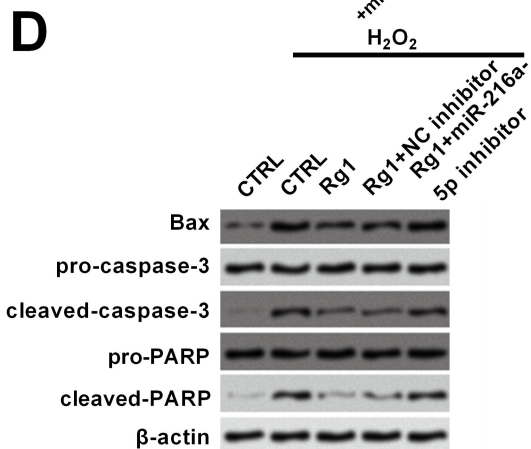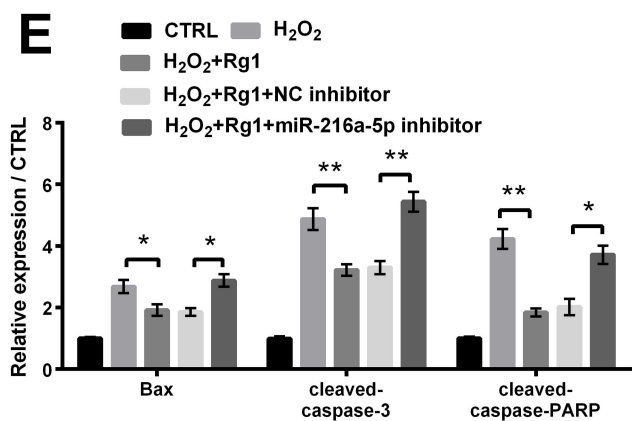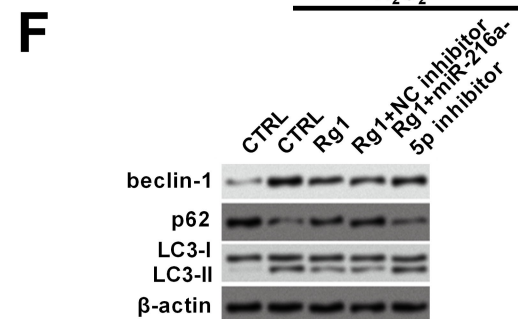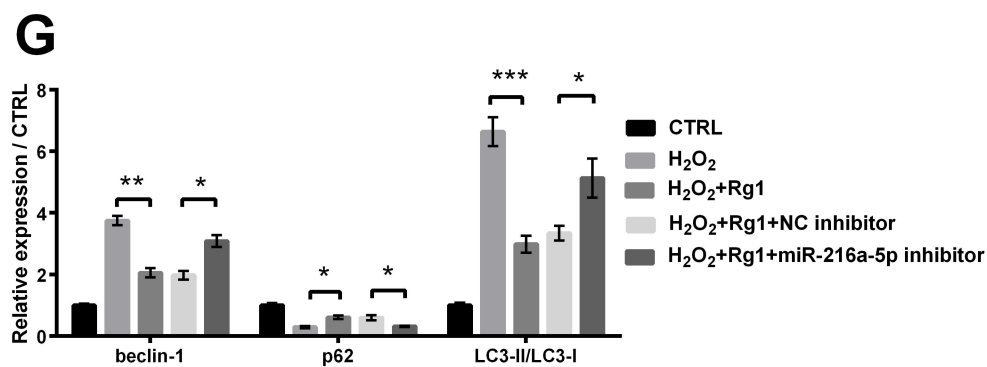

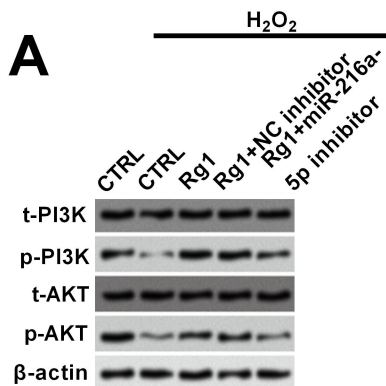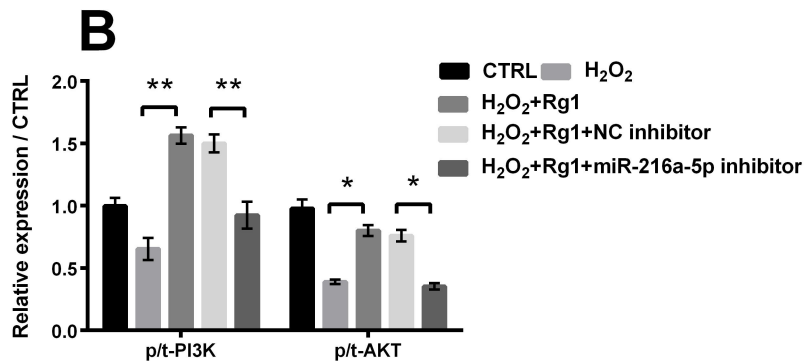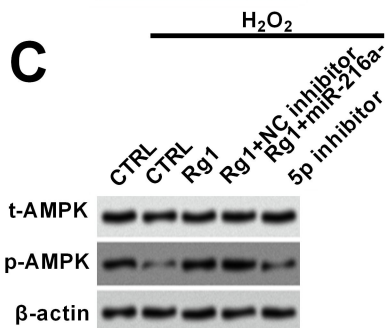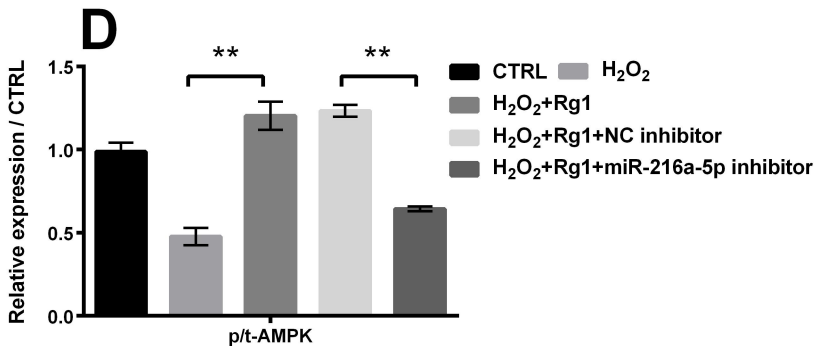

Source: https://www.biorxiv.org/content/10.1101/662817v1.full.pdf
